# Supplementary material for: Mesangial Cells Exhibit Features of Antigen-Presenting Cells and Activate CD4+ T Cell Responses
Source: Hindawi journal article supplement (doi:10.1155/2019/2121849), 2019-06-17
Supplement: f1 [file 2121849.f1.pdf]

Figure S1

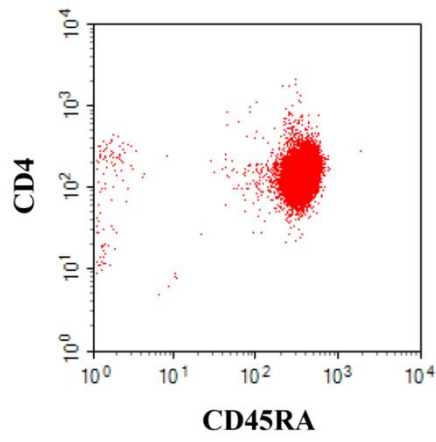

(a)

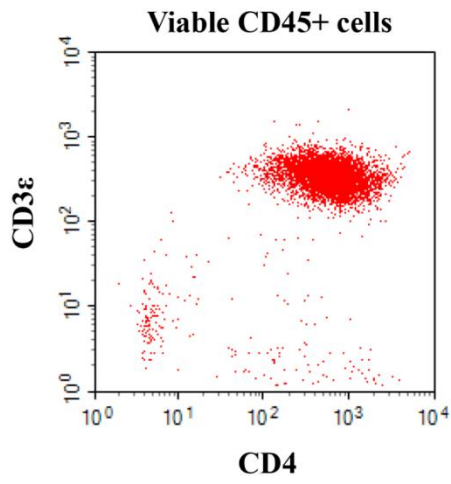

**Gated on CD45+ CD3ε+ CD4+ T cells**

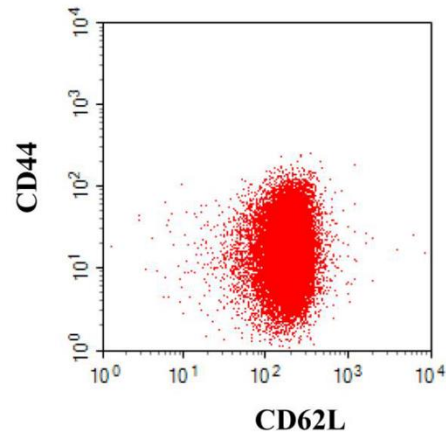

(b)
